# Supplementary material
Source: PubMed Central journal article supplement (PMC7242701)
Supplement: supp_RA120.013073_158882_1_supp_504291_q8dhv6.pdf [file supp_RA120.013073_158882_1_supp_504291_q8dhv6.pdf]

## Supplementary information

### **Activation and selectivity of OTUB-1 and OTUB-2 deubiquitinylases**

Dakshinamurthy Sivakumar<sup>1</sup>, Vikash Kumar<sup>1,2</sup>, Michael Naumann<sup>2</sup> and Matthias Stein<sup>1\*</sup>

<sup>1</sup>Max Planck Institute for Dynamics of Complex Technical Systems, Molecular Simulations and Design Group, Sandtorstrasse 1, 39106 Magdeburg, Germany.

<sup>2</sup>Institute of Experimental Internal Medicine, Medical Faculty, Otto von Guericke University, Leipziger Strasse 44, 39120 Magdeburg, Germany.

\*To whom correspondence should be addressed: Dr Matthias Stein, Molecular Simulations and Design Group, Max Planck Institute for Dynamics of Complex Technical Systems, Sandtrostrasse 1, 39106 Magdeburg, Germany. matthias.stein@mpi-magdeburg.mpg.de, Tel. +49 391 6110436.

```

OTUB1      MAAEEPQQQKQEPLGSDSEGVNCLAYDEAIMAQQDRIQQEIAVQNPLVSEERLELSVLYKE 60
OTUB2      -----MSETSFNLISEKCDILSILR- 20
           .. *:*:*: :: : :

OTUB1      YAEDDNIYQQKIKDLHKKYSYIRKTRPDGNCIFYRAFGFSLHLEALLDDSKELQRFKAVSAK 120
OTUB2      DHPENRIYRRKIEELSKRFTAIRKTKGDGNCIFYRALGYSYLELLGKSREIFKFKERVLQ 80
           : :.*:*:*:*:* *:*:*: *****:*:*:*:*:*..*:*:*: ** :

OTUB1      SKEDLVSQGFTEFTIEDFHNTFMDLIEQVEKQTSVADLLASFNDQSTSDYLVVYLRLLTS 180
OTUB2      TPNDLLAAGFEEHKFRNFFNAFYVVELVEKDGSVSLLKVFNDQSASDHIVQFLRLLTS 140
           : :*:*:*: ** *..*:*:*: ::* *****: **:.** *****:*:*:*:*****

OTUB1      GYLQRESKFFFEHFIEGGRTVKEFCQQEVEPMCKESDHIHIALAQAQSVSIQVEYMDRGE 240
OTUB2      AFIRNRADFFRHFIDEEMDIKDFCTHEVEPMATECDHIQITALSQALSIALQVEYVDEMD 200
           : :*:*:*:*:*:*: :*:* ** :*****..*.*:*:* *:*:*:*:*:*:*:*:*:*:

OTUB1      GGTTPHIFPEGSEPKVYLLYRPGHYDILYK---- 271
OTUB2      T-ALNHHVFPEAATPSVYLLYKTSHYNILYAADKH 234
           : * *:*:*:*:*: *..*****: .**:*:*

```

**Figure S1:** Sequence alignment of OTUB1 and OTUB2. The symbols “\*, :, .” represents fully conserved, strongly similar and weakly similar properties, respectively.

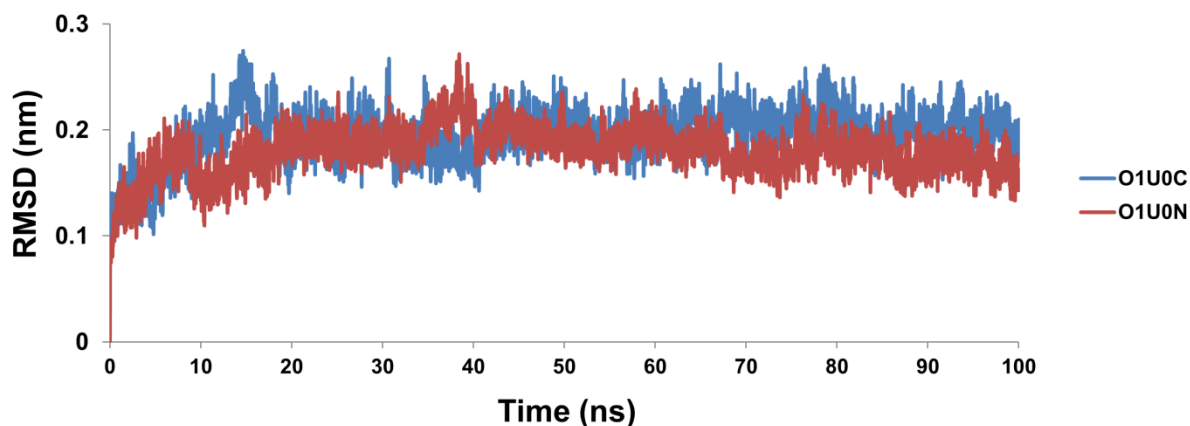

**Figure S2:** RMSD in nm (Cα) plot of ubiquitin-free OTUB1 in charged O1U0C and neutral O1U0N protonation states of active site residues.

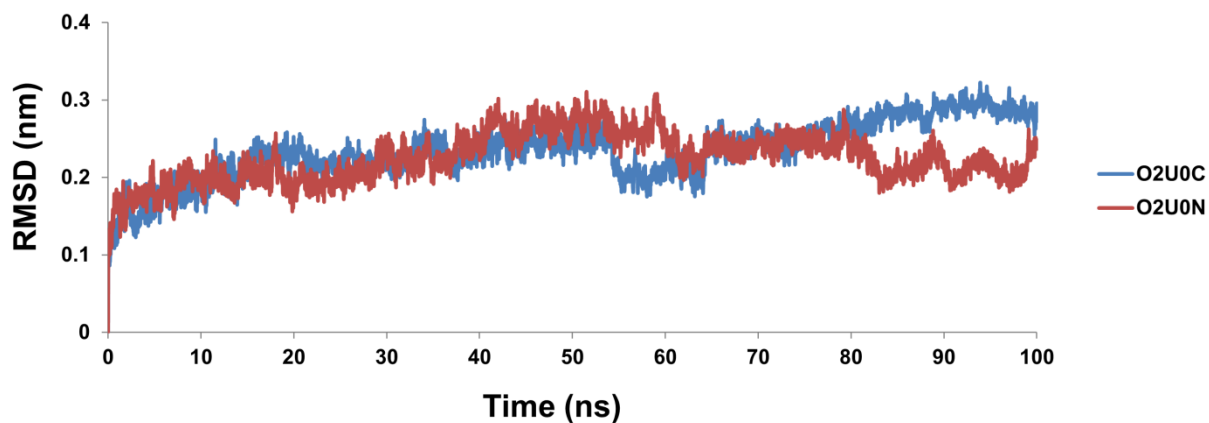

**Figure S3:** RMSD in nm ( $C\alpha$ ) plot of ubiquitin-free OTUB2 in charged O2U0C and neutral O2U0N protonation states of active site residues.

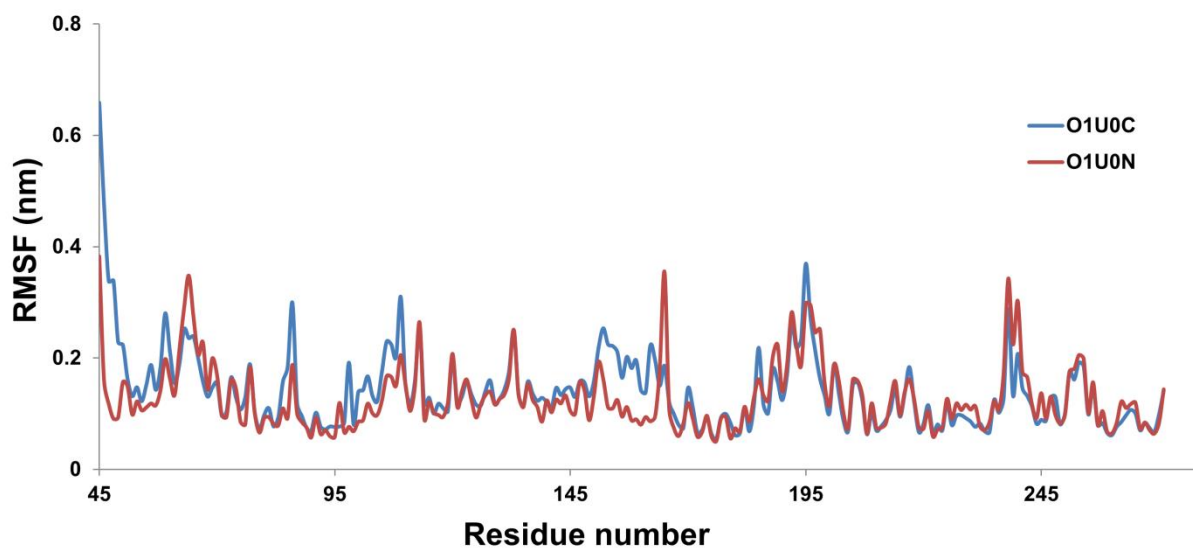

**Figure S4:** RMSF in nm of amino acid residues of the ubiquitin-free OTUB1 protein conformation in charged O1U0C and neutral O1U0N states of active site residues.

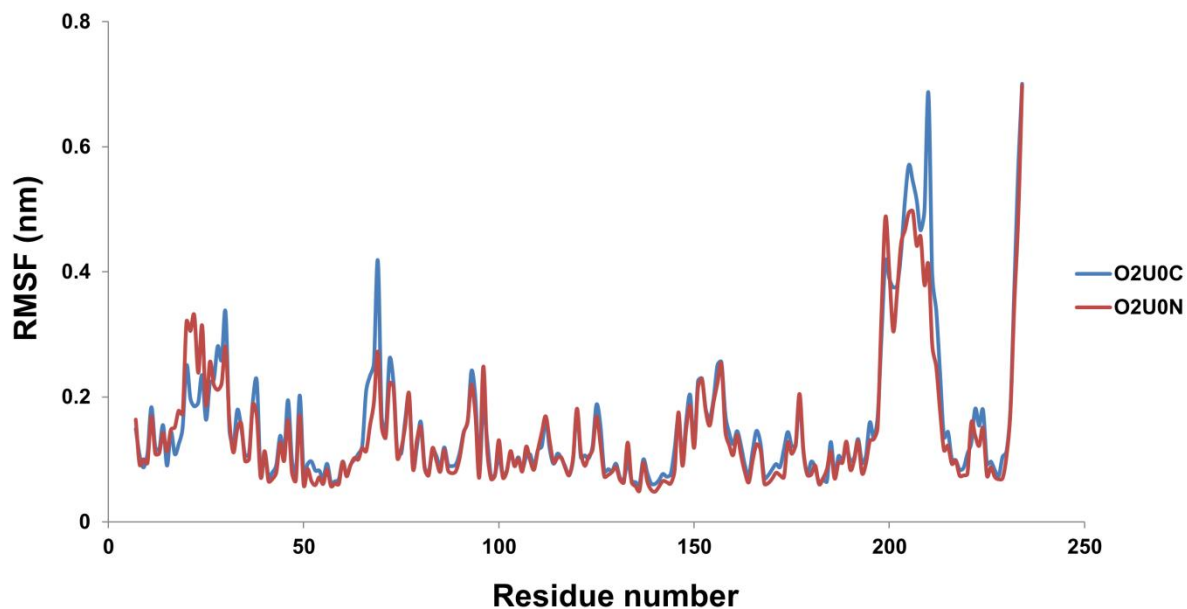

**Figure S5:** RMSF in nm of amino acid residues of the ubiquitin-free OTUB2 protein conformation in charged O2U0C and neutral O2U0N states of active site residues.

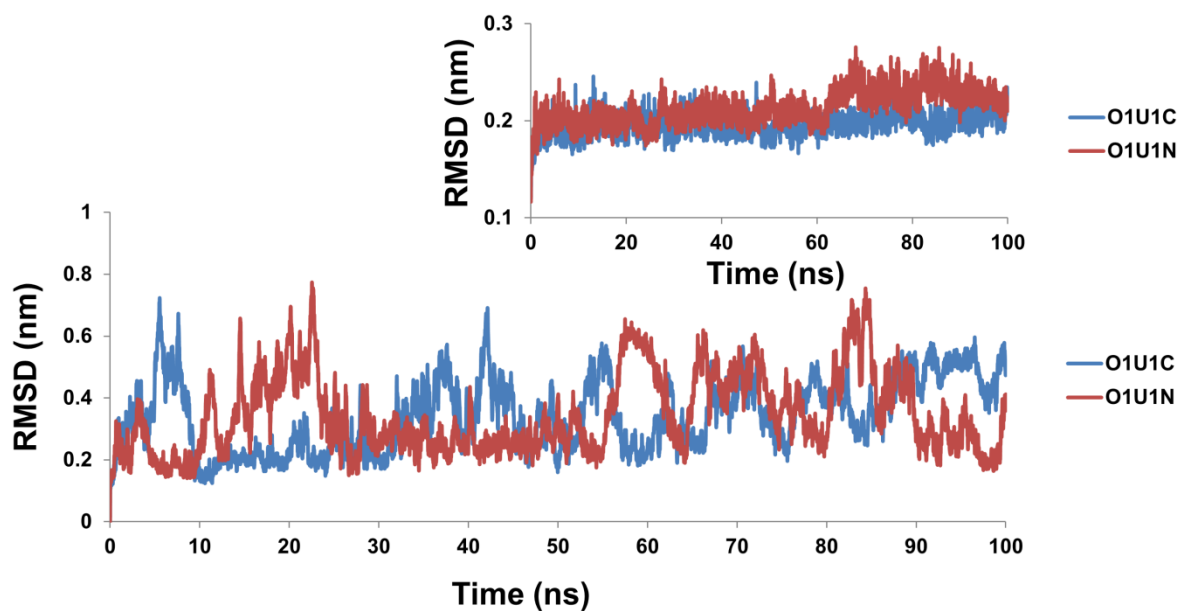

**Figure S6:** RMSD in nm ( $C\alpha$ ) plot of ubiquitin-bound OTUB1 protein conformation in charged states O1U1C and O1U1N. The inset figure shows the RMSD in nm ( $C\alpha$ ) plot of the holo OTUB1 without N-terminal residues (1-21 amino acids).

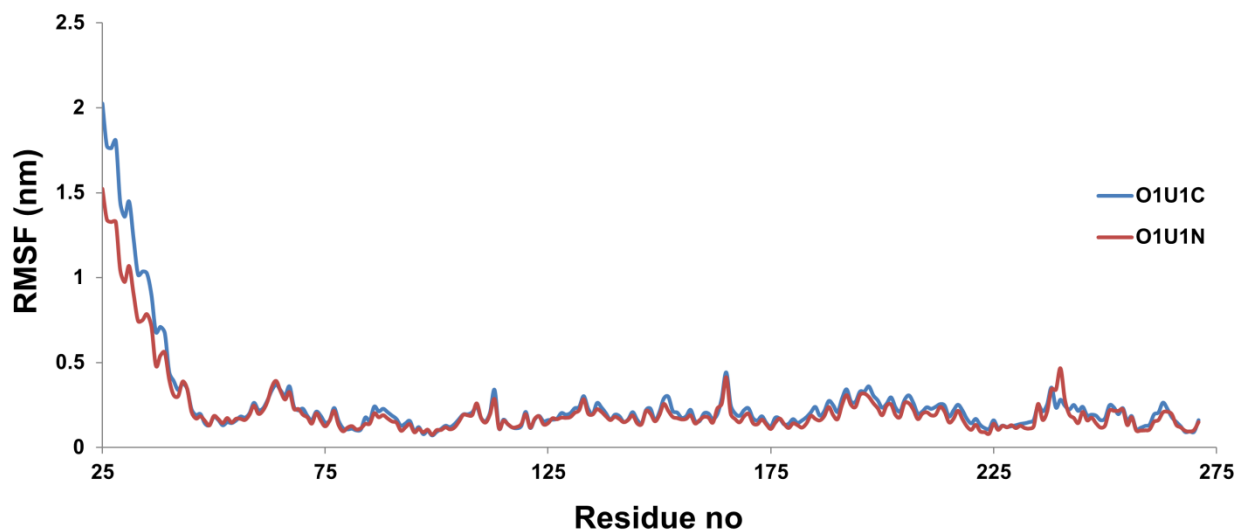

**Figure S7:** RMSF in nm of amino acid residues of the ubiquitin-bound protein conformation OTUB1 in charged O1U1C and neutral O1U1N protonation states of active site residues.

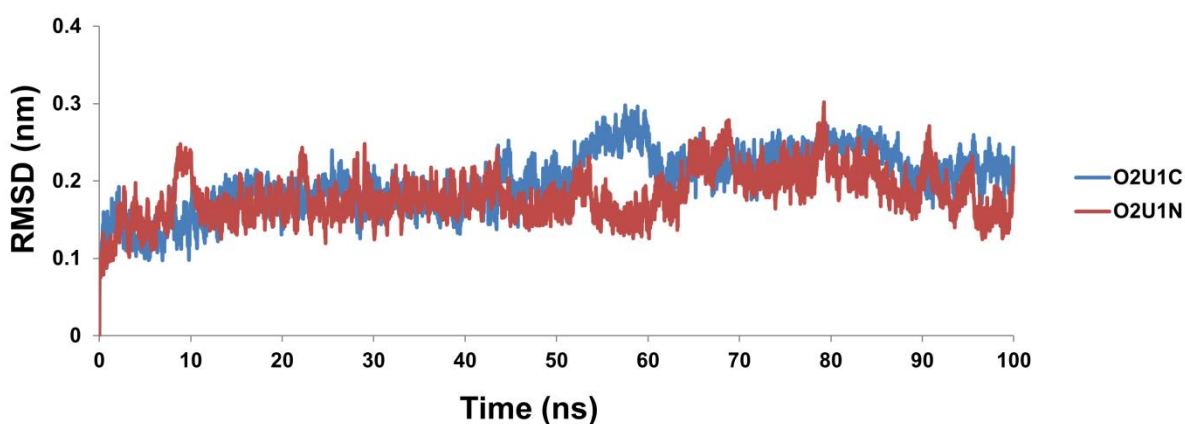

**Figure S8:** RMSF in nm of amino acid residues of the ubiquitin-bound protein conformation OTUB2 in charged O2U1C and neutral O2U1N protonation states of active site residues.

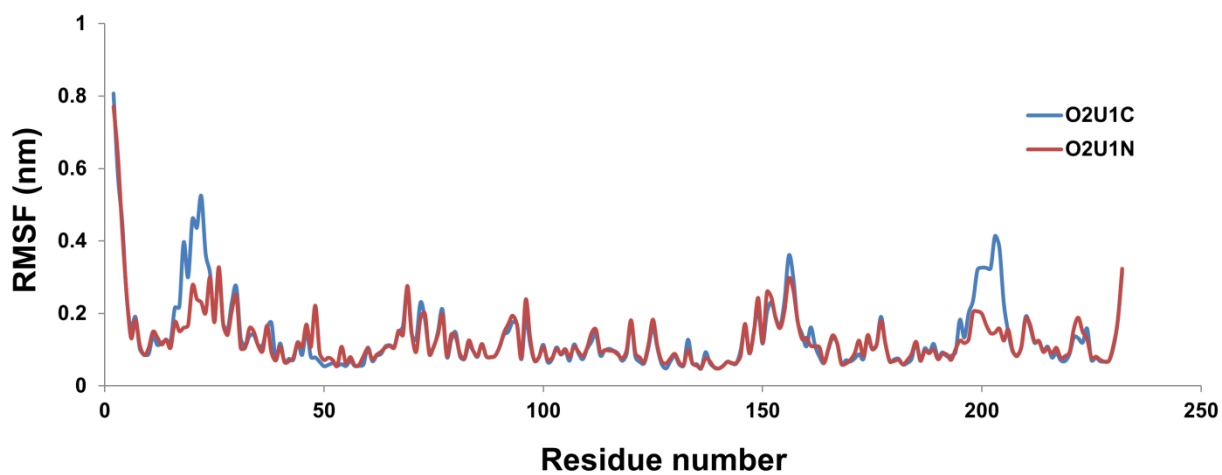

**Figure S9:** RMSF in nm of amino acid residues of ubiquitin-bound OTUB2 conformation in charged O2U1C and neutral O2U1N states of active site residues.
